# Supplementary material for: AHR is a master regulator of diverse pathways in endogenous metabolism
Source: PubMed Central journal article supplement (PMC9534852; doi:10.1038/s41598-022-20572-2), 2022-10-05
Supplement: 41598_2022_20572_MOESM7_ESM.pdf [file 41598_2022_20572_MOESM7_ESM.pdf]

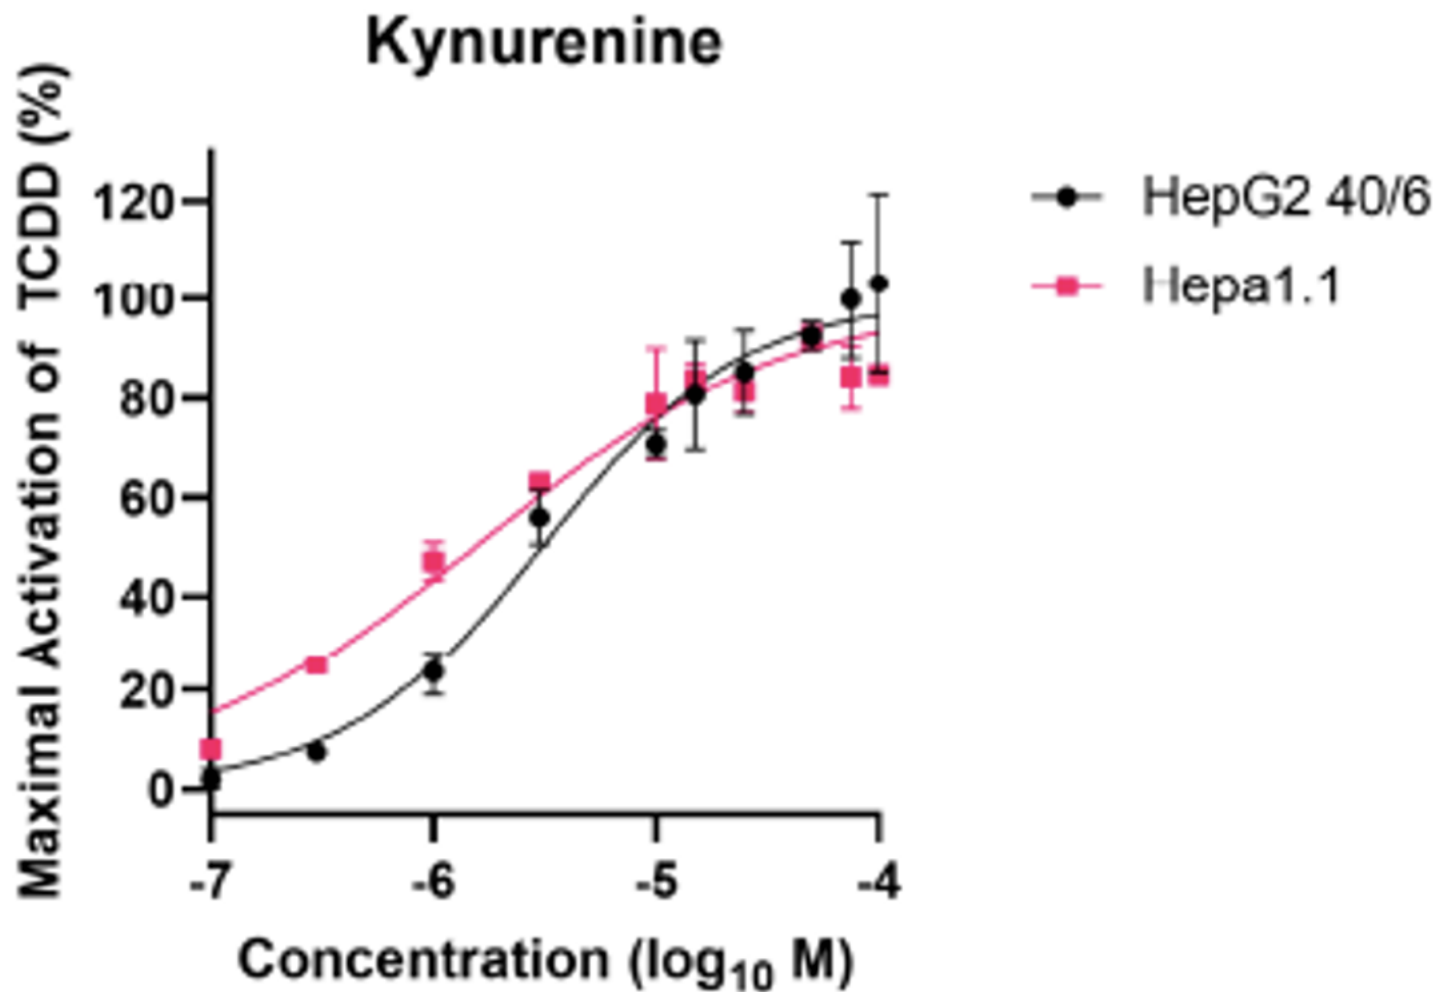

**Supplementary Figure S1:** Kynurenine was assessed for its ability to activate both human and murine AHR at ten biologically relevant doses (100 nM, 300 nM, 1, 3, 10, 15, 25, 50, 75, 100  $\mu$ M final concentrations). TCDD (10 nM final concentration) was used to determine maximal activation of AHR, and the presented values were normalized as a percentage of TCDD activation. Each data point represents the mean  $\pm$  S.D. of three biological replicates.
